# Supplementary material for: Optimization of In Situ Indentation Protocol to Map the Mechanical Properties of Articular Cartilage
Source: MDPI journal article supplement (doi:10.3390/ma15186425), 2022-09-16
Supplement: s1 [file s1]

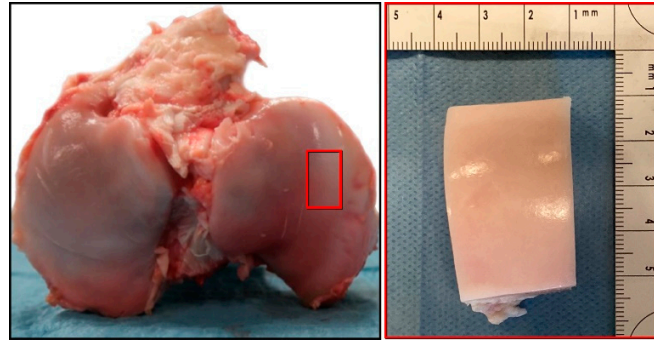

**Supplementary Figure S1.** Example of a bovine knee tibial plateau (left), from which samples suitable for indentation test were extracted (right).

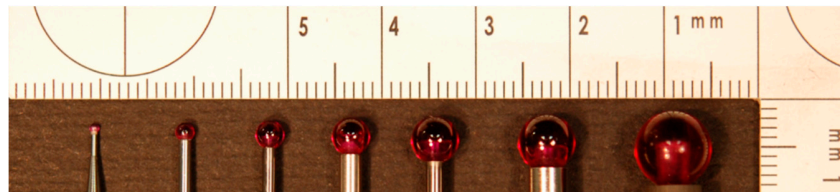

**Supplementary Figure S2.** Spherical indenters used to test knee articular cartilage, starting from 1-mm (left) to 8-mm (right) diameter indenter.

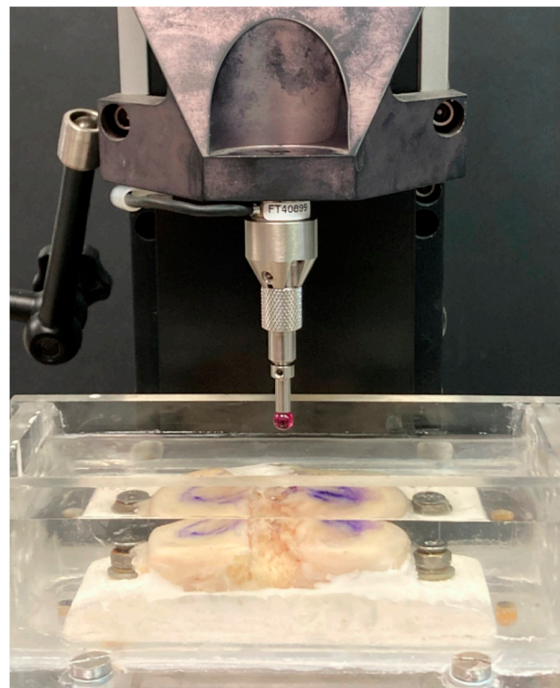

**Supplementary Figure S3.** The human tibial plateau constrained to the X-Y motorized table of the testing machine. The 6-mm diameter indenter is also visible.

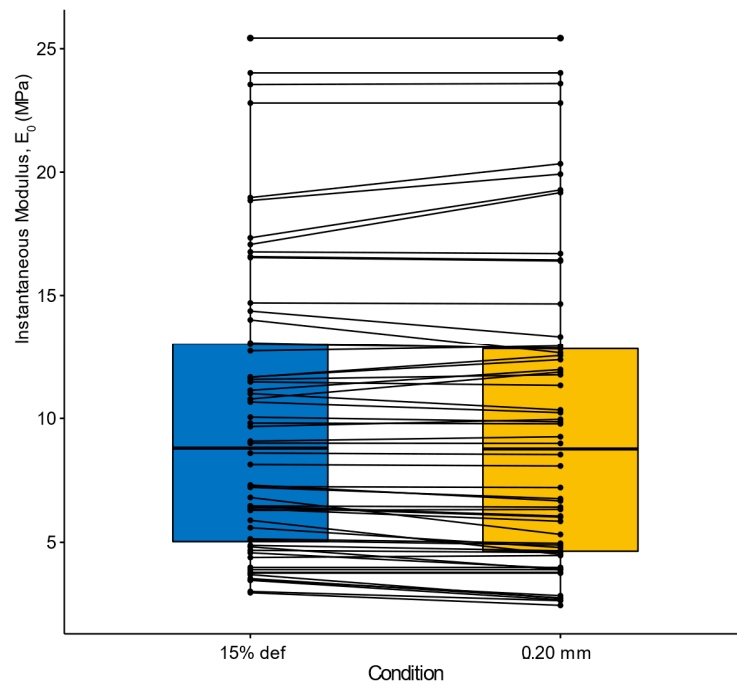

**Supplementary Figure S4.** Distributions of  $E_0$  values determined with different imposed deformation, i.e., a nominal deformation of 15%, and a 0.20 mm displacement.

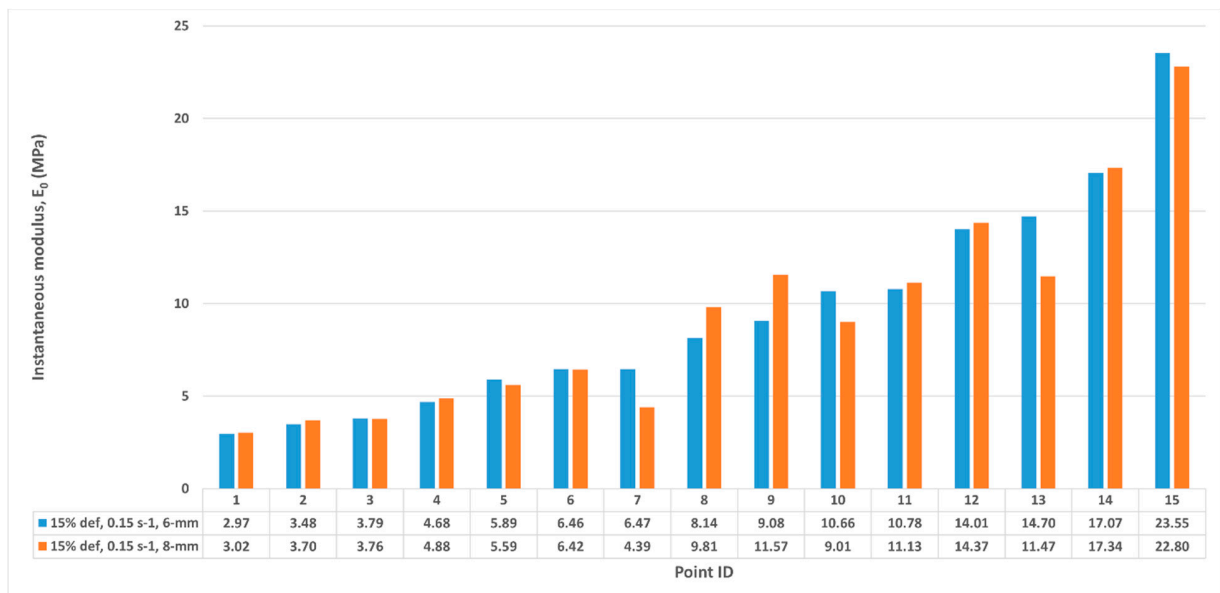

**Supplementary Figure S5.**  $E_0$  values determined for the investigated points onto the human tibial plateau by using 6-mm and 8-mm indenters (nominal deformation of 15% of the cartilage thickness,  $0.15 \text{ s}^{-1}$  indentation rate).

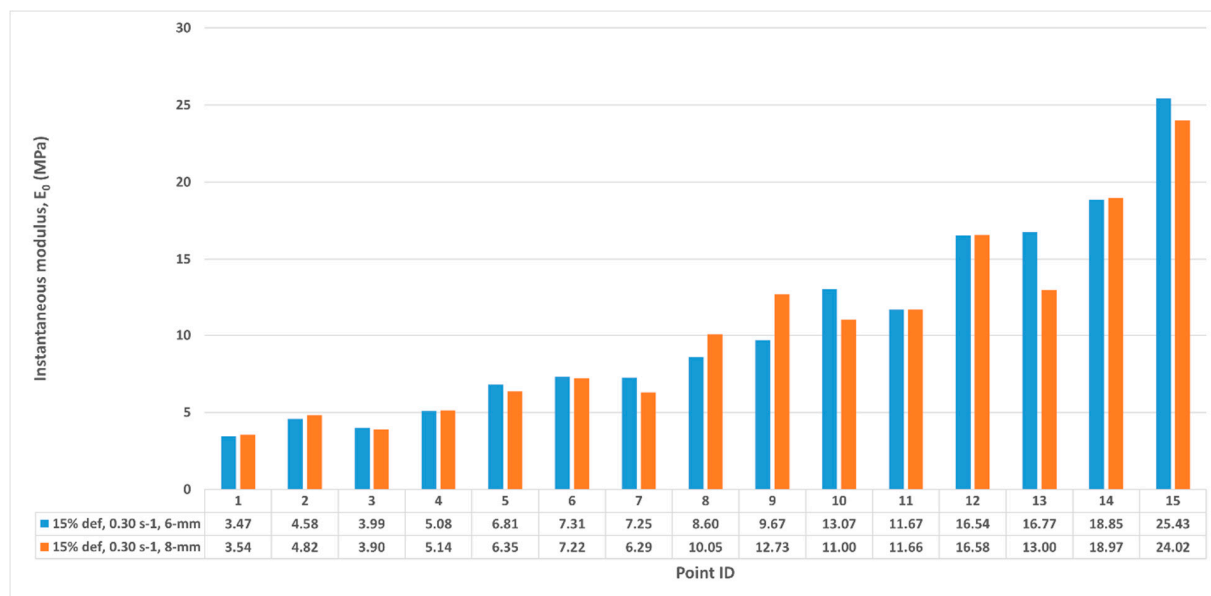

**Supplementary Figure S6.**  $E_0$  values determined for the investigated points onto the human tibial plateau by using 6-mm and 8-mm indenters (nominal deformation of 15% of the cartilage thickness,  $0.30 \text{ s}^{-1}$  indentation rate).

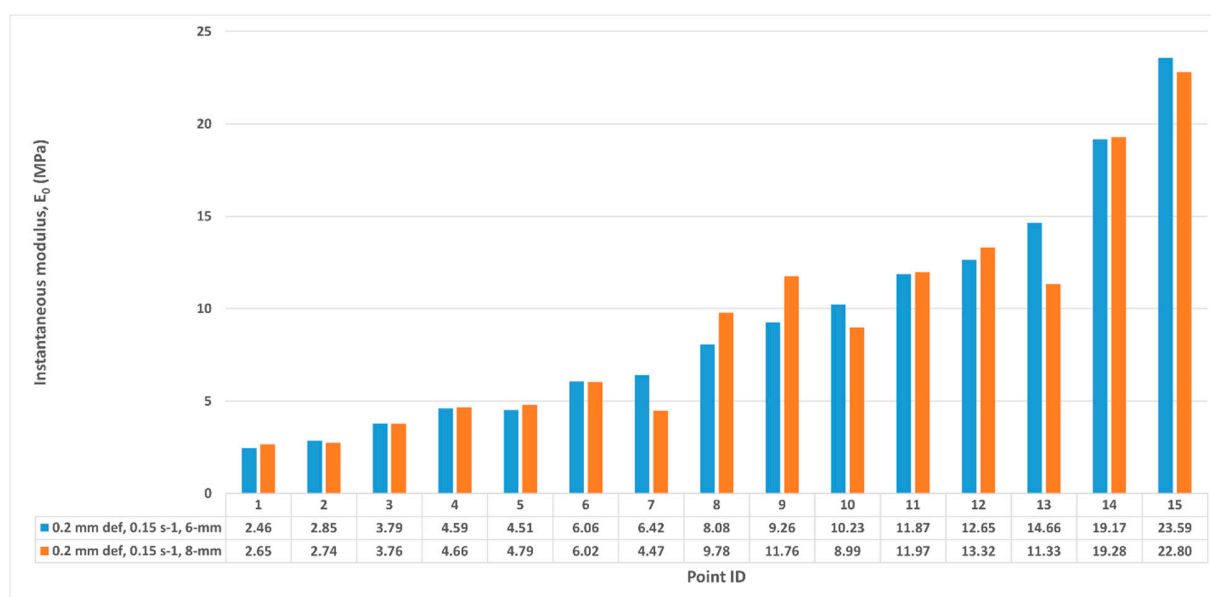

**Supplementary Figure S7.**  $E_0$  values determined for the investigated points onto the human tibial plateau by using 6-mm and 8-mm indenters (indentation depth of 0.20 mm,  $0.15 \text{ s}^{-1}$  indentation rate).

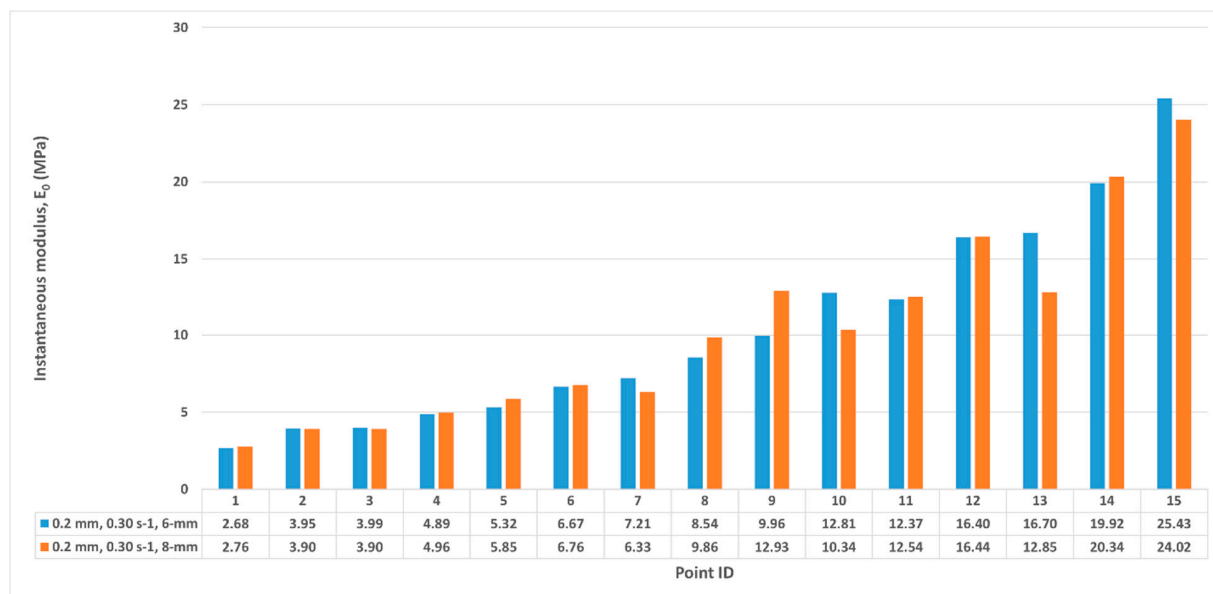

**Supplementary Figure S8.**  $E_0$  values determined for the investigated points onto the human tibial plateau by using 6-mm and 8-mm indenters (indentation depth of 0.20 mm, 0.30 s<sup>-1</sup> indentation rate).

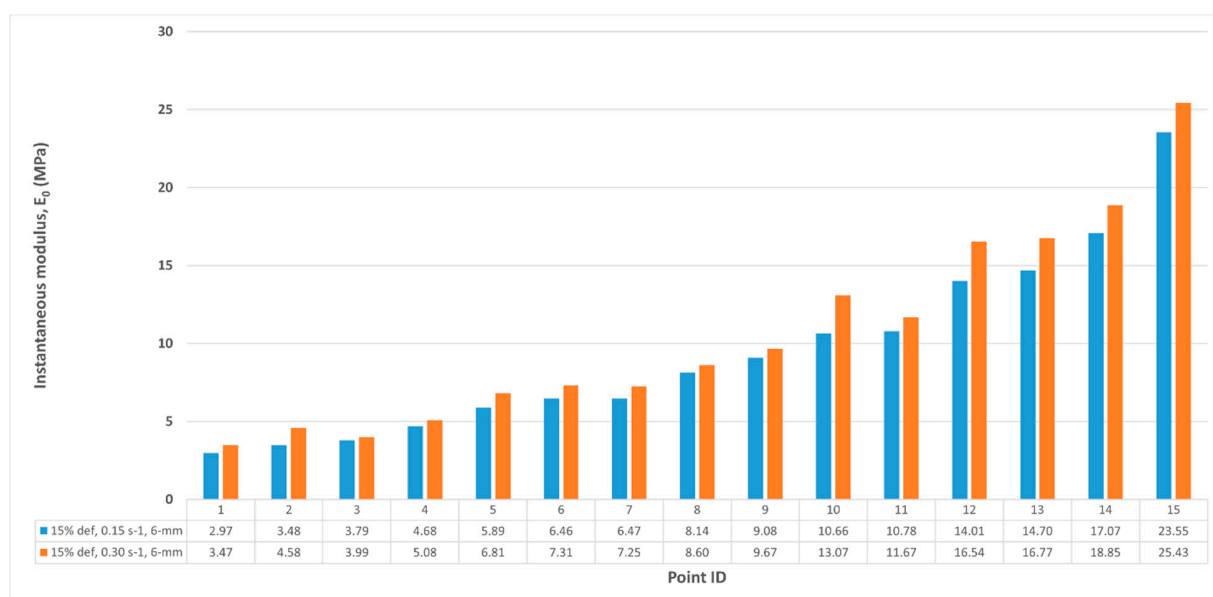

**Supplementary Figure S9.**  $E_0$  values determined for the investigated points onto the human tibial plateau by using 0.15 s<sup>-1</sup> and 0.30 s<sup>-1</sup> indentation rate (nominal deformation of 15% of the cartilage thickness, 6-mm indenter diameter).

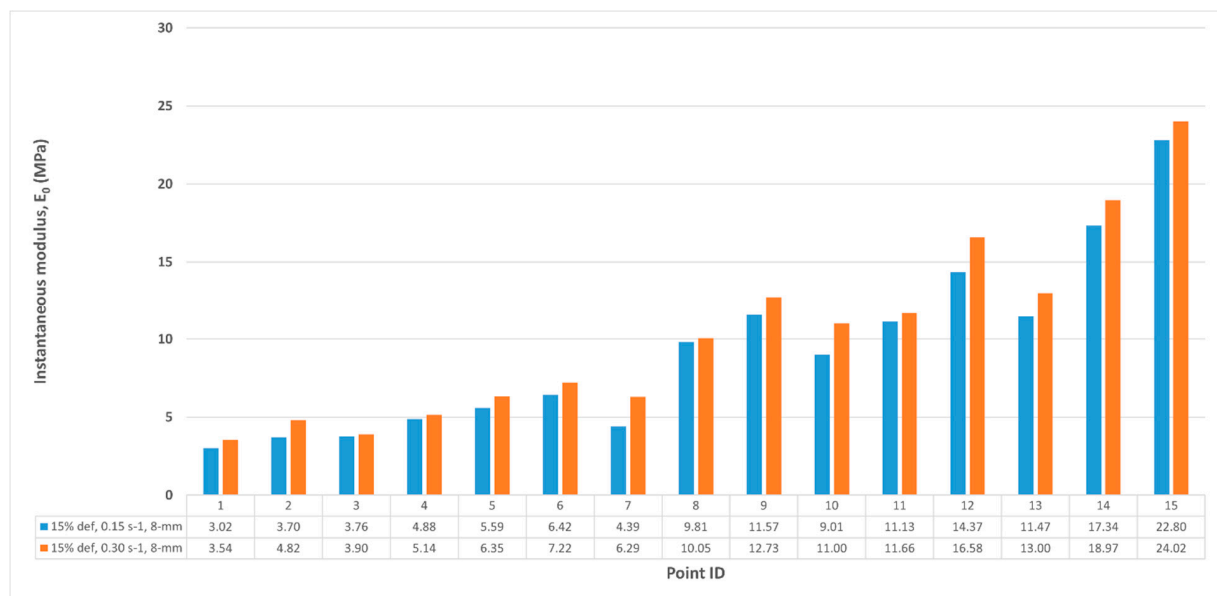

**Supplementary Figure S10.**  $E_0$  values determined for the investigated points onto the human tibial plateau by using  $0.15 \text{ s}^{-1}$  and  $0.30 \text{ s}^{-1}$  indentation rate (nominal deformation of 15% of the cartilage thickness, 8-mm indenter diameter).

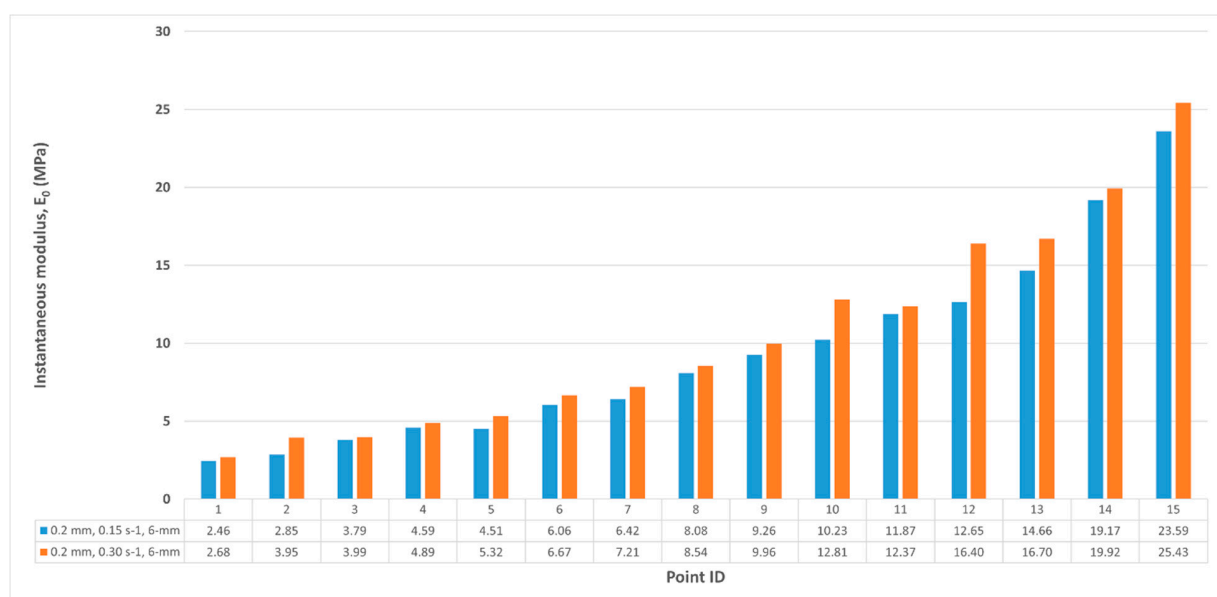

**Supplementary Figure S11.**  $E_0$  values determined for the investigated points onto the human tibial plateau by using  $0.15 \text{ s}^{-1}$  and  $0.30 \text{ s}^{-1}$  indentation rate (indentation depth of 0.20 mm, 6-mm indenter diameter).

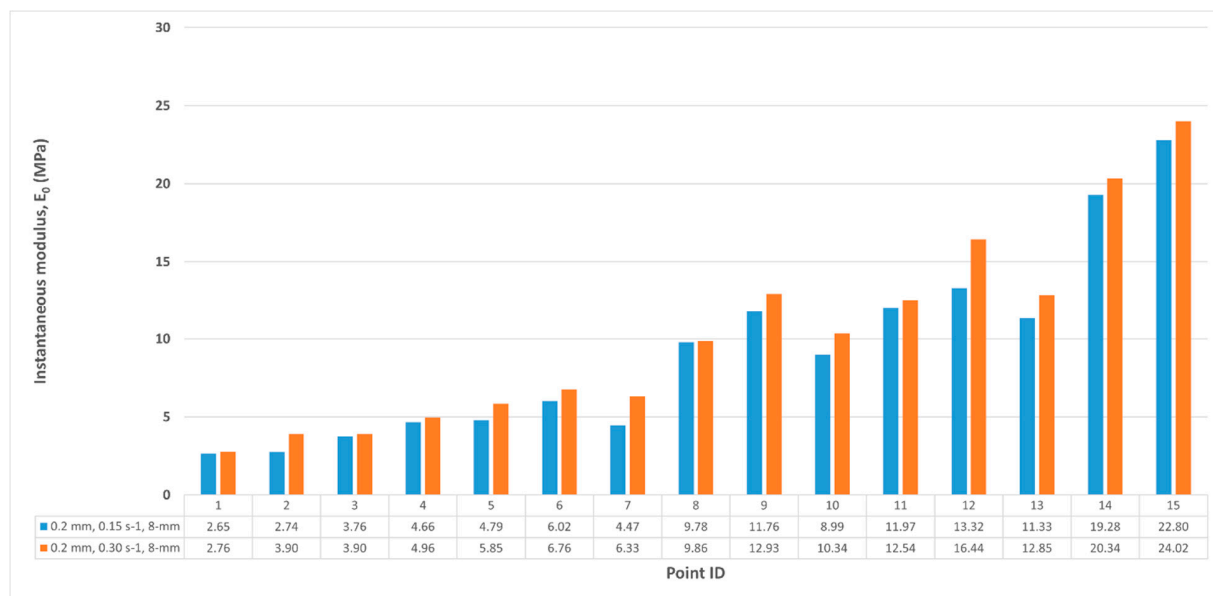

**Supplementary Figure S12.**  $E_0$  values determined for the investigated points onto the human tibial plateau by using  $0.15 \text{ s}^{-1}$  and  $0.30 \text{ s}^{-1}$  indentation rate (indentation depth of 0.20 mm, 8-mm indenter diameter).

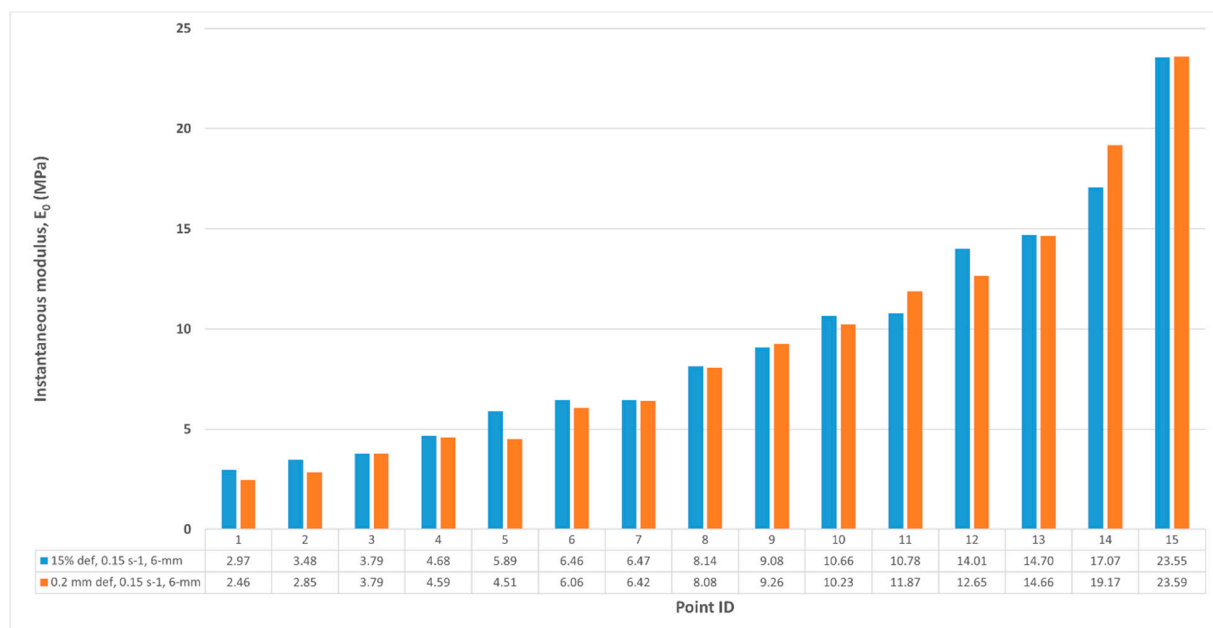

**Supplementary Figure S13.**  $E_0$  values determined for the investigated points onto the human tibial plateau by applying a nominal deformation of 15% of the cartilage thickness, or an indentation depth of 0.20 mm (indentation rate of  $0.15 \text{ s}^{-1}$ , 6-mm indenter diameter).

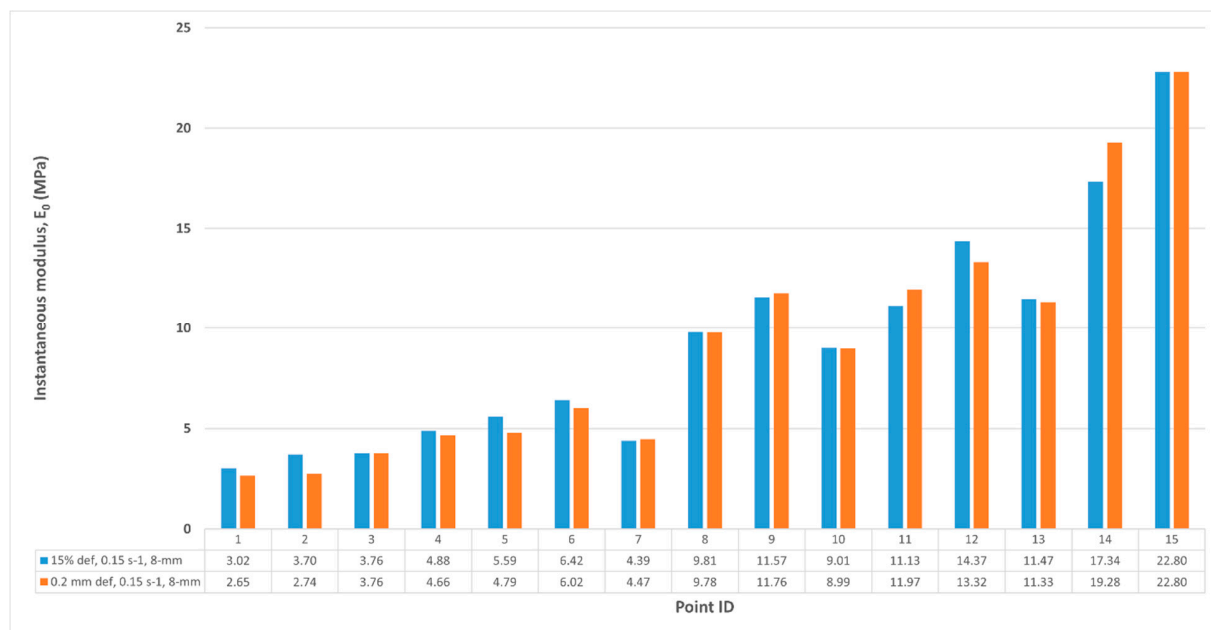

**Supplementary Figure S14.**  $E_0$  values determined for the investigated points onto the human tibial plateau by applying a nominal deformation of 15% of the cartilage thickness, or an indentation depth of 0.20 mm (indentation rate of  $0.15 \text{ s}^{-1}$ , 8-mm indenter diameter).

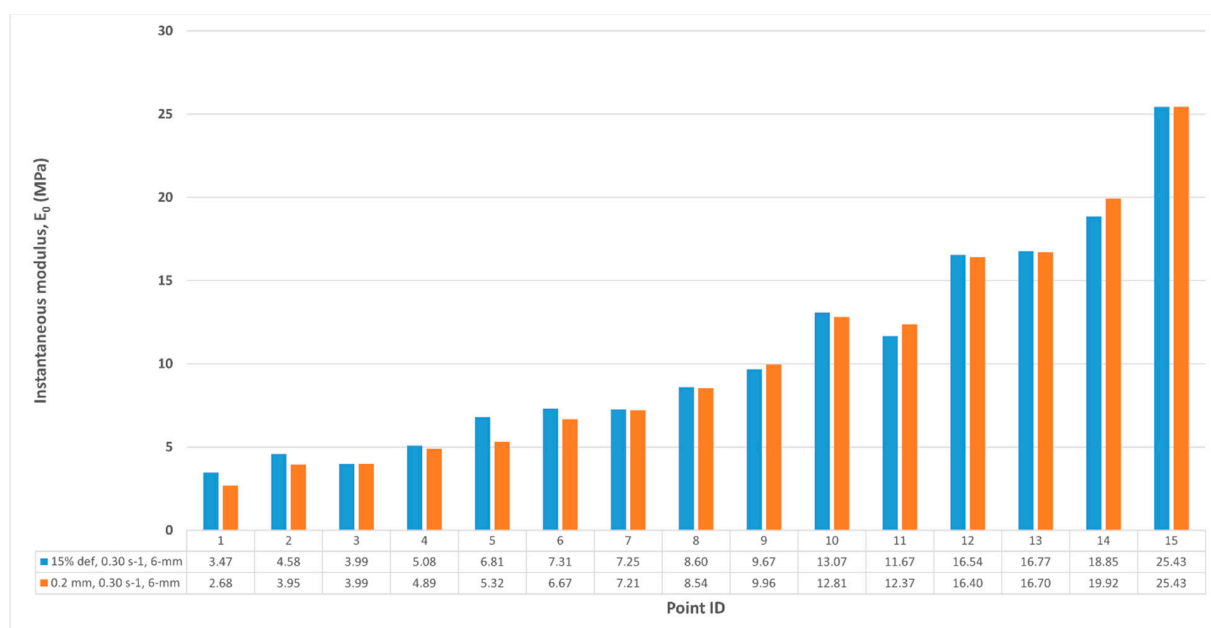

**Supplementary Figure S15.**  $E_0$  values determined for the investigated points onto the human tibial plateau by applying a nominal deformation of 15% of the cartilage thickness, or an indentation depth of 0.20 mm (indentation rate of  $0.30 \text{ s}^{-1}$ , 6-mm indenter diameter).

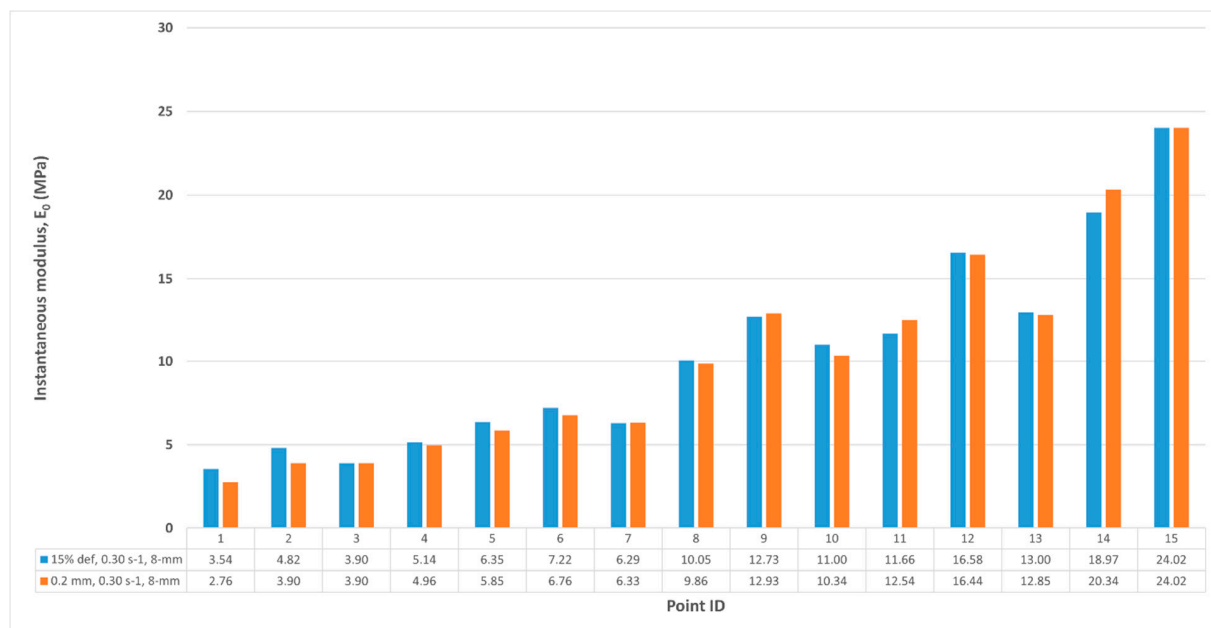

**Supplementary Figure S16.**  $E_0$  values determined for the investigated points onto the human tibial plateau by applying a nominal deformation of 15% of the cartilage thickness, or an indentation depth of 0.20 mm (indentation rate of  $0.30 \text{ s}^{-1}$ , 8-mm indenter diameter).

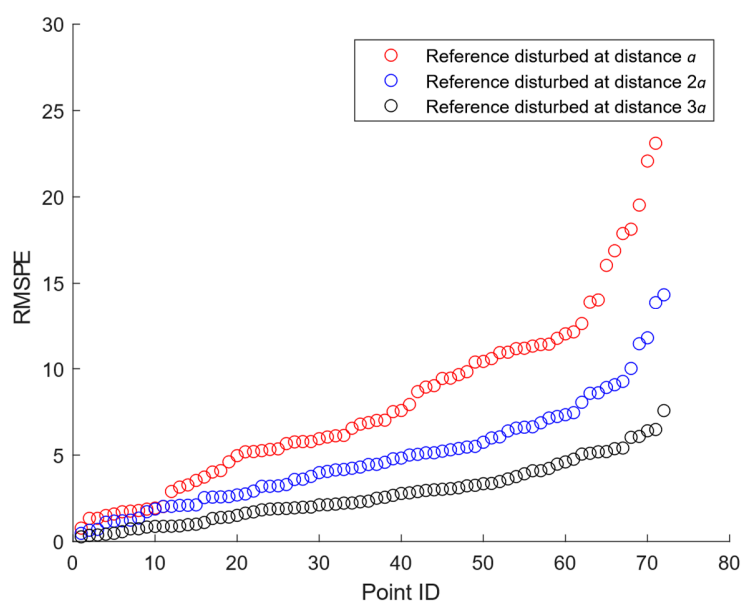

**Supplementary Figure S17.** Root mean square percentage error (RMSPE) calculated comparing the 72 stretched-exponential functions describing the response of the cartilage without perturbation (noPI) with each of the stretched-exponential function describing the response of the perturbed cartilage ( $PIa$ ,  $PI2a$ ,  $PI3a$ ) in the same 72 measuring points.
